# Is thrombin a key player in the ‘coagulation-atherogenesis’ maze?

Julian Ilcheff Borissoff<sup>1</sup>, Henri M.H. Spronk<sup>1</sup>, Sylvia Heeneman<sup>2</sup>, and Hugo ten Cate<sup>1\*</sup>

<sup>1</sup>Laboratory for Clinical Thrombosis and Hemostasis, Department of Internal Medicine, Cardiovascular Research Institute Maastricht (CARIM), Maastricht University Medical Center+ (MUMC+), Universiteitsingel 50, PO Box 616, Box 8, 6200 MD Maastricht, The Netherlands; and <sup>2</sup>Department of Pathology, Cardiovascular Research Institute Maastricht (CARIM), Maastricht University Medical Center+ (MUMC+), Maastricht, The Netherlands

Received 17 September 2008; revised 7 February 2009; accepted 17 February 2009; online publish-ahead-of-print 19 February 2009

Time for primary review: 28 days

## KEYWORDS

Thrombin;  
FIIa;  
Coagulation;  
Atherogenesis;  
Atherosclerosis

In addition to its established roles in the haemostatic system, thrombin is an intriguing coagulation protease demonstrating an array of effects on endothelial cells, vascular smooth muscle cells (VSMC), monocytes, and platelets, all of which are involved in the pathophysiology of atherosclerosis. There is mounting evidence that thrombin acts as a powerful modulator of many processes like regulation of vascular tone, permeability, migration and proliferation of VSMC, recruitment of monocytes into the atherosclerotic lesions, induction of diverse pro-inflammatory markers, and all of these are related to the progression of cardiovascular disease. Recent studies in transgenic mice models indicate that the deletion of the natural thrombin inhibitor heparin cofactor II promotes an accelerated atherogenic state. Moreover, the reduction of thrombin activity levels in apolipoprotein E-deficient mice, because of the administration of the direct thrombin inhibitor melagatran, attenuates plaque progression and promotes stability in advanced atherosclerotic lesions. The combined evidence points to thrombin as a pivotal contributor to vascular pathophysiology. Considering the clinical development of selective anticoagulants including direct thrombin inhibitors, it is a relevant moment to review the different thrombin-induced mechanisms that contribute to the initiation, formation, progression, and destabilization of atherosclerotic plaques.

## 1. Introduction

There is abundant evidence for a close interaction between inflammation and coagulation systems and a bidirectional cooperation between these mechanisms has been proposed.<sup>1,2</sup> Although the important contribution of blood cells involved in coagulation, particularly platelets and leucocytes, to atherothrombosis is beyond dispute, the properties of several coagulation proteins and their expression in atherosclerotic lesions suggest that they might also contribute to the pathogenesis of cardiovascular disease (CVD).

With the current development of highly specific antithrombotic agents including thrombin inhibitors aimed for long-term use in patients with CVD it seemed appropriate to focus on the pleiotropic actions of thrombin, in order to better appreciate possible long-term sequelae related to thrombin inhibition. This is even more important considering a number of physiological functions of thrombin (anticoagulant, vasodilating properties) that are of importance in a healthy vascular system. Taking physiology as a starting

point for this review we next focus on the different mechanisms by which thrombin may modulate the formation of the atherosclerotic lesion and the course of atherogenesis.

## 2. Thrombin's functional roles in physiology

In the coagulation cascade, thrombin is one of the key players. It is a central enzyme generated upon the exposure of tissue factor (TF) which binds and activates circulating factor VII and subsequently enters into the formation of a complex with factor X. The formed prothrombinase complex of factor Xa, factor Va, calcium (Ca<sup>2+</sup>) cleaves prothrombin into thrombin. Thus the coagulation pathways are amplified by thrombin feedback activation of the cofactors V and factor VIII and the activation of the factor XI zymogen. Hence, generated thrombin leads to the conversion of fibrinogen into fibrin and ultimately to the formation of a fibrin clot.

Thrombin activates a subfamily of G protein-coupled receptors named protease-activated receptors (PARs)—1, 3, and 4, affecting processes such as vasomotor regulation. Thrombin depicts a two-faceted role at the level of vascular reactivity, showing diverse vasoactive features, not only

\* Corresponding author. Tel: +31 43 3884262; fax: +31 43 3884159.  
E-mail address: h.tencate@bioch.unimaas.nl

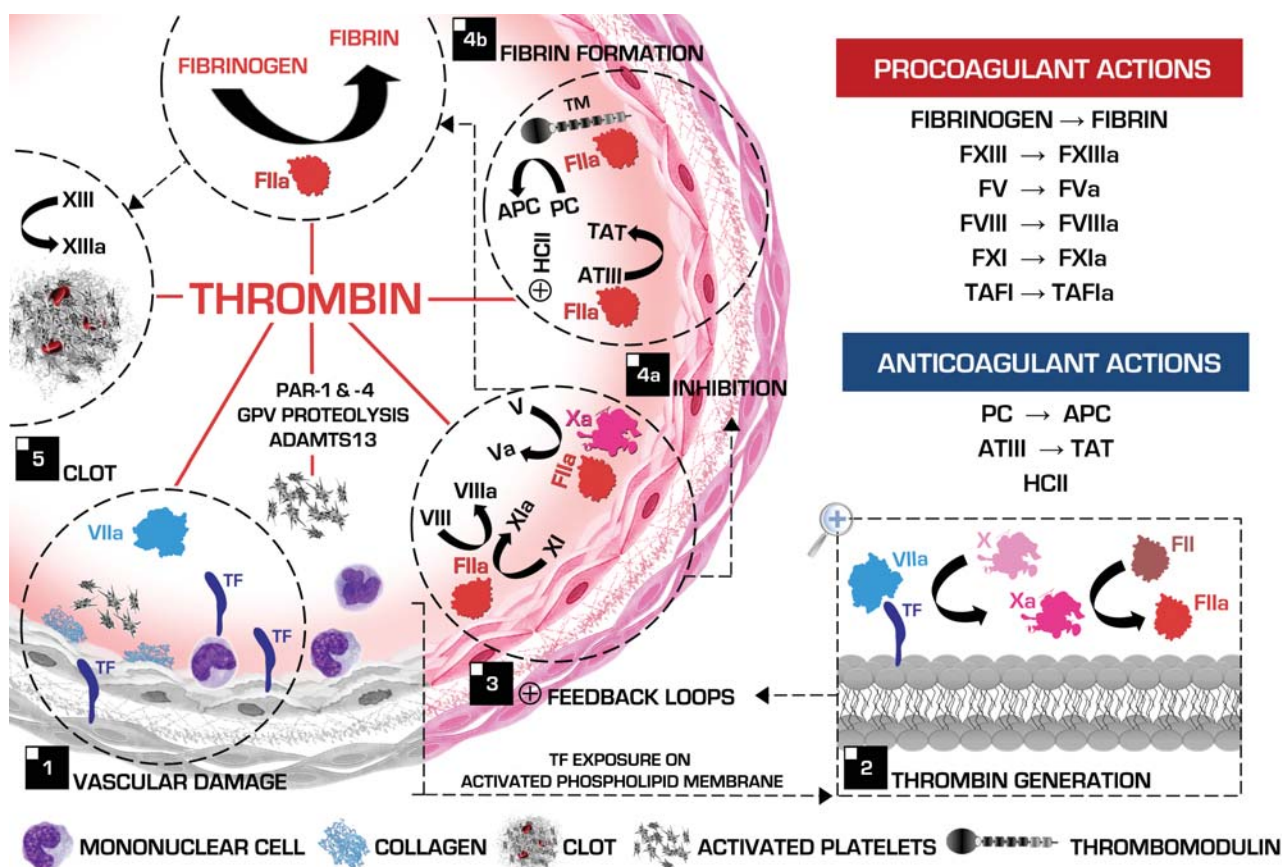

**Figure 1** Antagonizing actions of thrombin in coagulation cascade. Platelets get activated by the collagen that is exposed at sites of vessel damage, leading to the formation of a haemostatic plug. (1, 2) Thrombin (FIIa) is generated upon tissue factor (TF) exposure but the reaction is relatively slow. (3) Once formed, thrombin activates factor V, factor VIII, and factor XI, which results in a 300 000-fold acceleration, amplification, and thrombin propagation. (4a) To prevent a massive conversion of fibrinogen into fibrin and thereby leading to the formation of a stable clot, all natural anticoagulant pathways get activated. Thrombin gets involved into these actions by binding thrombomodulin (TM), which results in the activation of protein C (PC) into activated protein C (APC), which by proteolytic cleavage of activated factors V and VIII reduces the rate of thrombin generation. In addition, antithrombin (ATIII) forms a thrombin–antithrombin (TAT) complex, which irreversibly inhibits thrombin, in association with heparin and heparin cofactor II. (4b) In case the procoagulant stimulus overpowers the capacity of the anticoagulant pathways, this would result in more production of fibrin and would lead to the formation of a thrombus. Thrombin–thrombomodulin (T-TM) complex could additionally support the procoagulant actions of thrombin by activating thrombin-activatable fibrinolysis inhibitor (TAFI), thereby inhibiting fibrinolysis. (5) Except for the exposed collagen at the site of injury, platelets also get activated by thrombin via PAR-1- and PAR-4-mediated mechanisms but also by cleavage of glycoprotein V (GPV). Thrombin also prevents destabilization of the platelet plug by inhibiting ADAMTS13 action (a disintegrin and metalloproteinase with a thrombospondin type 1 motif, member 13). Thrombin facilitates clot stabilization by activating factor XIII (fibrin stabilizing factor) which has the capacity to crosslink fibrin.

with regard to the type of vascular bed but also to the physiological condition of the vessel—whether healthy or diseased one. Several reports indicate that thrombin predominantly causes endothelium-dependent vasorelaxation in different species *in vitro*.<sup>3–5</sup> In addition, recent published data show that thrombin induces PAR-1-mediated forearm arterial vasodilatation in humans *in vivo*.<sup>6</sup> These endothelium-dependent dilating effects are generally attributed to a PAR-1-mediated production of various vaso-protective factors such as prostacyclin (PGI<sub>2</sub>), endothelium-derived hyperpolarizing factor, and mainly nitric oxide (NO).<sup>7</sup>

Similarly to its contrasting functional effects on vasoreactivity, thrombin demonstrates antagonizing actions in haemostasis also, e.g. the procoagulant action of converting fibrinogen into fibrin vs. the anticoagulant action of activating protein C (APC) after binding of thrombin to thrombomodulin (TM).<sup>8</sup> Moreover, systemically generated thrombin, not captured by receptors is rapidly inactivated by inhibitors such as antithrombin (AT), APC, or heparin-cofactor II (HCII).

Thrombin elicits at least 13 different actions (Figure 1). Thus, it consolidates its multifaceted character in physiology but it also establishes a strong link between coagulation and inflammation by playing a substantial role in the PAR-dependent initiation of different pro-inflammatory responses in various cell types including platelets, endothelial cells (EC), macrophages, and vascular smooth muscle cells (VSMC). Thrombin's humoral and cellular actions in normal and pathophysiological conditions are summarized in Figure 2.

### 3. Thrombin as a trigger of endothelial dysfunction

Endothelial dysfunction, which is characterized with the inability of the endothelium to regulate its key functions (vascular tone, haemostasis, cellular adhesion, electrolyte balance, etc.) is thought to be a prerequisite for the initiation of an atherosclerotic plaque. Endothelial

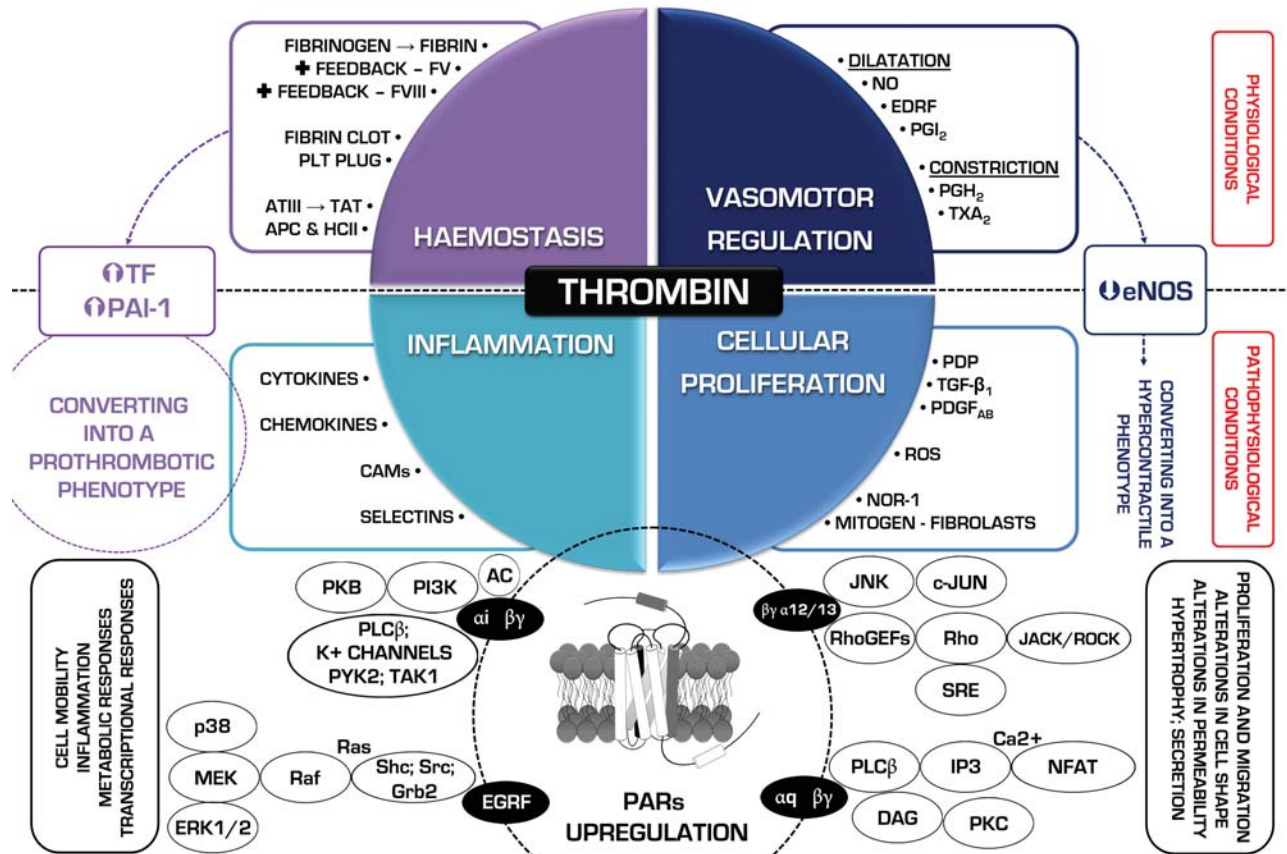

**Figure 2** Schematic overview of thrombin's humoral and cellular actions in normal and pathophysiological conditions. Relevant protease-activated receptors (PAR) signalling pathways. PLT, platelet; ATIII, antithrombin III; TAT, thrombin-antithrombin complex; APC, activated protein C; HClI, heparin cofactor II; CAMs, cell adhesive molecules; NO, nitric oxide; EDRF, endothelium-derived relaxing factors; PGI<sub>2</sub>, prostacyclin; PGH<sub>2</sub>, prostaglandin H<sub>2</sub>; TxA<sub>2</sub>, thromboxane A<sub>2</sub>; PDP, platelet-derived products; TGF-β<sub>1</sub>, transforming growth factor-β<sub>1</sub>; PDGF<sub>AB</sub>, platelet-derived growth factor<sub>AB</sub>; ROS, reactive oxygen species; NOR-1, neuron-derived orphan receptor-1.

dysfunction results in increased interactions of circulating cells with the endothelium contributing to enhanced permeability. Thrombin signalling in the endothelium, mediated by PARs, might interlace with some of these pathophysiological pathways by triggering a multitude of phenotypic drifts, including changes in vascular tone, EC shape, haemostasis, permeability, downstream gene transcription, and angiogenesis.

### 3.1. Thrombin, vascular tone, and phenotypic alterations of the endothelium

Despite the evolving experimental evidence on the molecular mechanisms of thrombin's signalling in endothelium, mediated via PAR-1 and -4,<sup>9</sup> thrombin's actions in terms of vasomotor physiology are partly elucidated. However, it is known that thrombin induces contrary effects such as endothelium-dependent or direct smooth muscle contraction in healthy animal arteries *in vitro*.<sup>3,10</sup> Endothelium-independent venoconstriction is observed in humans *in vivo*.<sup>6</sup> Thrombin mediates its vasoconstrictive actions by the secretion of prostaglandin H<sub>2</sub> (PGH<sub>2</sub>) or thromboxane A<sub>2</sub> (TxA<sub>2</sub>).<sup>7,10</sup> NO has a critical impact on the mediation of vascular relaxation and endothelial function. It is synthesized by an endothelial nitric oxide synthase (eNOS) and this enzyme competes with arginase for L-arginine as a substrate. It has been indicated that PARs could regulate

eNOS activity by phosphorylating the enzyme at several sites.<sup>11</sup> Ser1177, Ser615, Ser633, and Tyr81 enhances the production of NO, whereas Thr495 inhibits. Thrombin mediates eNOS-Ser1177 phosphorylation through Gq and a calcium and protein kinase C (PKC)-delta sensitive, but phosphatidylinositol 3-kinase (PI3K)/Akt-independent pathway. The phosphorylation of eNOS-Thr495 and inhibition of NO synthesis is thought to be directed via the activation of the Rho/ROCK pathway.<sup>11,12</sup> Prolonged incubation with thrombin has been reported to inhibit the synthesis of eNOS in EC.<sup>12,13</sup> Moreover, multiple *in vitro* studies report that thrombin increases arginase activity, thereby suppressing NO production.<sup>14-16</sup> In addition, the overexpression of arginase by thrombin leads to the depletion of the L-arginine pool, reducing NO production and inducing reactive oxygen species (ROS) synthesis owing to the eNOS uncoupling, which eventually compromises the endothelial function.<sup>17</sup> Endothelin-1, a powerful natural vasoconstrictor, also showed an increased expression upon stimulation with thrombin.<sup>18</sup>

The antagonizing effects of thrombin on vasoactivity seem relevant to the type of vascular bed and the severity of atherosclerotic burden is also dependent on thrombin concentration and continuance of action. In normal arteries, the short-term effect of thrombin is shown to support predominantly the action of vasorelaxants such as NO and PGI<sub>2</sub>. On the other hand, increased thrombin generation is usually

concentrated at the sites of vascular injury or within formed thrombus *in vivo*,<sup>19</sup> but also in patients with advanced CVD or suffering acute coronary syndromes.<sup>20</sup> In vascular lesions thrombin promotes a pro-inflammatory response, characterized by increased production of diverse chemokines and cytokines, cell adhesion molecules (CAMs), enhanced vascular permeability, VSMC migration and proliferation, wall thickening and vasoconstriction.<sup>7</sup> This might be a result of the combination of a diminished TM and endothelial protein C receptor (EPCR) capacity coupled to an overexpression of PAR-1 and PAR-2 receptors in vascular lesions.<sup>21–23</sup> Various mechanisms have been reported linked to PARs upregulation. First, thrombin-induced activation of PAR-1 in cultured human EC *in vitro* upregulates PAR-1 gene expression by signalling via Gi1/2 coupled to Src and PI-3K, thus inducing the downstream Ras/MAPK pathway.<sup>24</sup> Selective augmentation of PAR-2 and -4 gene expression is indicated upon treatment with inflammatory stimuli such as interleukin (IL)-1 $\alpha$ , (IL)-1 $\beta$ , tumour necrosis factor (TNF)- $\alpha$ , and lipopolysaccharide (LPS).<sup>25,26</sup> Finally, high shear stress, also characterized by reduced expression of various atherogenesis-related genes, inhibits PAR-1 expression in human EC *in vitro*.<sup>27</sup> Thus, the alterations in the vascular tone and the degree of expression of PARs in the vessel wall might have additional impact on the potency of thrombin's cell signalling activity and the progression of atherosclerotic disease.

### 3.2. Impairing the barrier function and other thrombin-mediated effects on the endothelium

Rabiet *et al.*<sup>28</sup> proposed a mechanism in which thrombin stimulates the intracellular accumulation of Ca<sup>2+</sup>, consecutively activating the PKC pathway, and causing eventual disruption of (VE)-cadherin-catenin complexes at the EC-cell junctions. Further *in vitro* studies consolidated the participation of PKC in this pathophysiological process.<sup>29</sup> Moreover, Nobe *et al.*<sup>30</sup> suggested that thrombin-induced endothelial barrier impairment is a biphasic process in which the Rho/Rho kinase pathway is also involved leading to rearrangement of actin stress fibres. A recent study elicits a new mechanism which gives input to a better comprehension of the thrombin-induced endothelial gap formation and permeability. It was proposed that thrombin activates metalloprotease ADAM10, which mediates VE-cadherin proteolysis by specifically cleaving its ectodomain.<sup>31</sup>

Thrombin could also promote the generation of endothelial microparticles (MPs) via ROCK-II activation.<sup>32</sup> Increase levels of endothelial MPs have been correlated with the morphology and severity of stenosis in patients with CVD.<sup>33</sup>

### 3.3. Thrombin-induced oxidative stress

Aside from the induction of pro-inflammatory responses, elevated ROS levels are presumably associated with the promotion of endothelial dysfunction, combined most likely with diminished NO bioavailability. The majority of risk factors of atherosclerosis positively correlate with an enhanced ROS synthesis, which tends to initiate multiple pro-atherogenic effects.<sup>34</sup> ROS are implicated in cellular signalling mechanisms, such as gene expression, proliferation, migration or apoptosis. Several reports indicate the potentiating effect of thrombin on ROS production in human VSMCs<sup>35,36</sup> and platelets.<sup>37</sup> Different enzymatic systems

take part in the production of ROS in the vasculature, such as xanthine oxidase, nicotinamide adenine dinucleotide phosphate (NADPH) oxidases, and NOS. Nevertheless, NADPH oxidases have been indicated as a major source of superoxide in vascular cells and myocytes.<sup>38</sup> The importance of NADPH oxidases in thrombin-induced ROS synthesis was studied by the depletion of p22phox subunit, which suppressed ROS formation in VSMCs.<sup>36,39</sup> Thrombin also triggers the activation of p38 mitogen-activated protein kinases (MAPK) in a NADPH oxidase-dependent manner,<sup>35,40</sup> which establishes a link between thrombin and the MAPK/ERK pathway, suggesting that it is also indirectly involved in processes like cell differentiation, cell survival, and apoptosis. Djordjevic *et al.*<sup>41</sup> demonstrated that thrombin induces elevated ROS production in EC *in vitro* by activating p38 MAPK and PI3K/Akt, inducing enhanced proliferation.

Intriguingly, thrombin induces its PAR-1 *de novo* re-expression via Src-dependent mechanism, including G proteins, PI3K, p38 MAPK, suggesting that redox pathways are also implicated in the regulation of PAR-1 expression.<sup>24</sup> The latter was consolidated by two reports indicating that treating VSMCs with either flavin inhibitor diphenyleneiodonium or antioxidants prevents PAR-1 upregulation upon stimulation by cyclic strain or oxidative agents.<sup>42,43</sup> Hawkins *et al.*<sup>44</sup> indicated a thrombin-induced mechanism, causing the production of mitochondrial-derived superoxide (mROS), which is an outcome of a Ca<sup>2+</sup> mobilization via inositol (1,4,5)-trisphosphate receptor (InsP<sub>3</sub>R), leading to a subsequent mitochondrial uptake of Ca<sup>2+</sup>, triggering mROS expression and nuclear factor-kappa B (NF- $\kappa$ B) pathway signalling, which strongly promotes the overexpression of intercellular cell adhesion molecule (ICAM)-1 and the adhesion of leucocytes to the vascular endothelium.

## 4. Thrombin in the early stage of atherosclerotic plaque formation

Although several more coagulation serine proteases could function as activators of PARs by cleaving the N-terminal extracellular domain (*Figure 3*) abundant *in vitro* experimental data suggest that thrombin is a critical mediator in the coagulation, inflammation, vessel wall crosstalk. Thrombin enhances ROS production in the arterial vessel wall facilitating lipid peroxidation and apoptotic processes. Thrombin also induces a plethora of pro-inflammatory mediators, causing alterations in gene transcription of IL-6, IL-8, monocyte chemoattractant protein 1 (MCP-1, CCL2), vascular cell adhesion molecule (VCAM)-1, and ICAM-1, etc., facilitating the recruitment of blood circulating monocytes into the arterial vessel wall and encourages early plaque formation. Its signalling mechanisms with a pro-atherogenic impact on the arterial vessel wall are mostly established via PARs.<sup>45</sup>

### 4.1. Thrombin-induced pro-inflammatory responses in blood and vascular wall

Thrombin participates in the selective recruitment of monocytes and T-cells into the vessel wall by inducing the synthesis of MCP-1 in EC and monocytes.<sup>46</sup> MCP-1 is a well-characterized chemokine which is abundant in human macrophage-rich atherosclerotic plaques.<sup>47</sup> Thrombin has been shown to augment mRNA levels encoding for MCP-1,

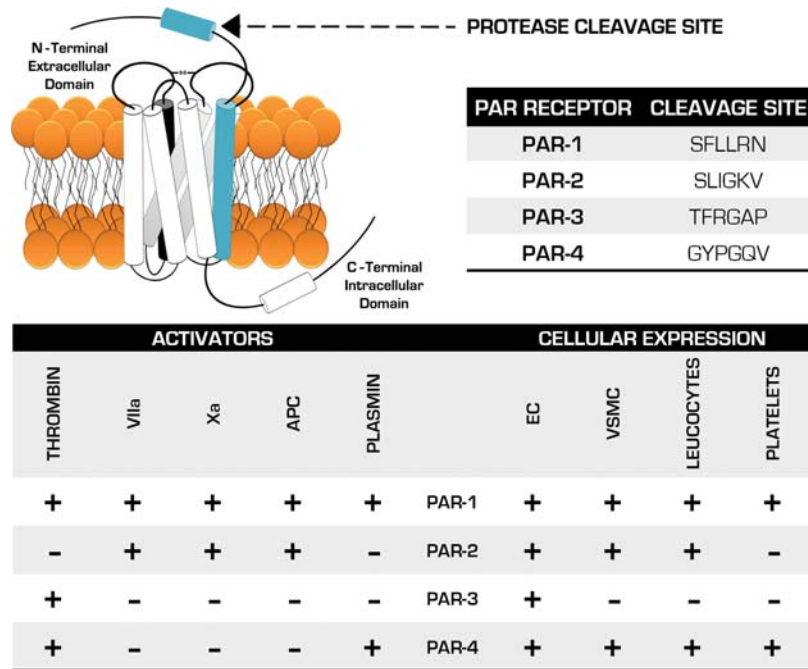

**Figure 3** Coagulation serine proteases and PARs—activation and cellular expression. PAR, protease-activated receptor; APC, activated protein C; EC, endothelial cells; VSMC, vascular smooth muscle cells.

IL-1 $\beta$ , IL-6, and TNF- $\alpha$  in human VSMC and less effectively, at high concentrations, in monocytes.<sup>48</sup> It was stated that MCP-1 synthesis in monocytes *in vitro*, co-cultured with EC, is mediated by a thrombin-induced production of fractalkine (FK, CX3CL1), a cytokine which effectively chemoattracts T-cells and monocytes and has definite roles in CVD progression.<sup>49</sup> In addition, in human EC *in vitro*, other inflammatory genes such as macrophage inflammatory protein 2- $\alpha$ , and neutrophil-activating protein 3, CD69, were reported to be overexpressed upon treatment with thrombin.<sup>50</sup>

Some of the pro-inflammatory properties of thrombin have been inferred from models of inflammation such as a peritonitis mouse model, in which the administration of the potent thrombin inhibitor hirudin suppressed the antigen- or LPS-stimulated activation of macrophage adhesion. In the same model, the intraperitoneal injection of purified thrombin stimulated the adhesion of macrophages and the accumulation of IL-6 and MCP-1 in a fibrinogen-dependent manner and independently from PAR-1 activation.<sup>51</sup> In a mouse heart-to-rat transplant model, a crucial role of PAR-1 activation by thrombin was shown in the initiation of leucocyte cell recruitment *in vivo*.<sup>52</sup>

As stated earlier, thrombin is known to potentiate the production of IL-6 both in EC<sup>53</sup> and VSMC *in vitro*.<sup>54</sup> IL-6 is an important cytokine with recognized impact on inflammation and is known to exacerbate atherosclerosis.<sup>55</sup> Thrombin upregulates IL-8 expression in the endothelium via p38 MAPK signalling pathway *in vitro*.<sup>56</sup> Similarly, IL-8 triggers monocyte adhesion to the endothelium under flow conditions *in vitro*<sup>57</sup> and is considered a possible biomarker to predict subclinical atherosclerosis based on data from multiple clinical trials.<sup>58</sup>

Finally, thrombin induces the secretion of macrophage migration inhibiting factor in EC and VSMC.<sup>59,60</sup>

#### 4.2. Thrombin-mediated leucocyte adhesion, rolling, and migration on the activated endothelium

Once the endothelium has been activated, various molecules get entangled in a molecular network of capture, activation, and rolling. Selectins comprise a family of CAM of transmembrane glycoproteins. L-, P-, and E-selectins are known to act as main mediator molecules for rolling of monocytes, neutrophils, T cells, and B cells upon binding to the activated endothelium. E- and P-selectins, in particular, play a substantial role in the initial capturing, tethering, and rolling of the leucocyte, relevant to the atherosclerotic development and progression.<sup>61</sup>

E-selectin, present on EC only, was expressed on the surface upon thrombin stimulation.<sup>62,63</sup> Much interest was devoted to the mechanism of this thrombin-mediated expression and it was indicated that thrombin intervenes in the phosphorylation and activation of p38 MAPK, thereby inducing NF- $\kappa$ B-dependent and -independent pathways.<sup>64</sup> Moreover, thrombin has the potential to promptly release P-selectin from the Weibel-Palade bodies in the EC.<sup>65</sup> It was recently demonstrated that there is a differential regulation of endothelial exocytosis of P-selectin and von Willebrand factor (vWF) by PARs and cAMP.<sup>66</sup>

Thrombin is not the only potent mediator for the expression of selectins on the endothelium. Many more factors like, e.g. TNF- $\alpha$  and IL-1  $\alpha$  intervene in the E- and P-selectin synthesis. Elevated expression of adhesion molecules on activated EC is considered a significant feature in the initiation of vascular lesions.<sup>67</sup> These pro-inflammatory responses additionally increase the overall expression of PARs, facilitating the endothelial reaction to thrombin, both with regard to endothelial dysfunction and further atherosclerotic progression.<sup>68</sup>

Thrombin has a powerful potential to activate the endothelium, especially via its PAR-1 and -2 receptors, but also incites the overexpression of important pro-atherogenic

immunoglobulin superfamily molecules such as ICAM-1 and VCAM-1.<sup>50,69,70</sup> Rolling activated leucocytes are exposed to the influence of various chemoattractants, mediated by diverse integrins, and captured to cell adhesion glycoproteins. This eventually leads to the so called 'leucocyte arrest'.

Thrombin enhances VCAM- and ICAM-1 synthesis in cultured human EC. NF- $\kappa$ B- and GATA-dependency was observed with regard to VCAM-1 expression.<sup>71</sup> Other *in vitro* studies indicated that PKC- $\delta$  and RhoA/ROCK activation independently lead to thrombin-induced NF- $\kappa$ B-dependent ICAM-1 upregulation.<sup>72,73</sup> Moreover, the inhibition of both c-Jun N-terminal kinase (JNK) and NF- $\kappa$ B pathways showed additive inhibitory effect on ICAM-1 expression on the endothelium and highlighted a significant role for JNK signalling.<sup>74</sup>

The actual process of transmigration of leucocytes usually occurs on activated endothelial regions thus facilitating the leucocytes to pass through. Thrombin seems to interlace by increasing the release of Ca<sup>2+</sup> from the intracellular stores,<sup>75,76</sup> favouring the ligation of ICAM-1, activating Rho family GTPases,<sup>77,78</sup> which increases the myosin contractility of EC impairing the inter-endothelial junctions by disrupting VE-cadherin complexes.<sup>79</sup>

#### 4.3. Thrombin and monocytes/macrophages in atherosclerosis

The effects of thrombin on monocytes and monocyte-derived macrophages during atherosclerotic progression remain less elucidated compared with other blood cells such as platelets. Initially, it was indicated that VSMC may be more sensitive to thrombin activation than monocytes and macrophages *in vitro*, the latter needing much higher concentrations of thrombin to achieve increased IL-6, IL-1 $\beta$ , MCP-1, or TNF- $\alpha$  mRNA expression.<sup>48</sup> Human monocytes, macrophages, and dendritic cells *in vitro* express PARs. PAR-1 was expressed in all cell types, whereas PAR-3 mRNA was less detected in monocytes and macrophages. PAR-1, -2, and -3 levels were upregulated upon thrombin treatment subsequently inducing MCP-1 expression. IL-4 downregulated PAR-1, -2, and -3 expression in dendritic cells derived from monocytes by granulocyte-macrophage colony-stimulating factor (GM-CSF).<sup>80</sup> Li *et al.* found PAR-4 protein expression on monocytes, though they failed to detect PAR-4 transcripts. They also showed that IL-6 was released upon treatment with agonist peptides of PAR-1 and PAR-4, but not of PAR-3 which was associated with PAR-3 incapability of mediating transmembrane signalling.<sup>81</sup>

Finally, there are multiple pro-inflammatory effects of thrombin on other cell types which indirectly induce pro-atherogenic reactions in monocytes (as discussed in the text).

### 5. Thrombin in the advanced stage of atherosclerosis

Intimal thickening, derangement of the arterial vessel wall anatomy in concert with accumulation of lipids, infiltration of cells, and matrix degradation, presented by a necrotic core are the basic histological features of the advanced atherosclerotic lesion.<sup>82</sup> Thrombin is implicated throughout plaque progression and destabilization events (*Figure 4*).

#### 5.1. Thrombin and platelet-mediated effects in plaque progression and destabilization

Besides being a major activator of platelets, thrombin likely induces platelet-mediated atherogenic signals by boosting the synthesis and release of multiple pro-inflammatory mediators by platelets and deploying their interaction with leucocytes to favour chemotaxis, adhesion, and migration into the arterial vessel wall. Platelet activation by thrombin is accomplished exclusively by targeting PAR-1 and -4 receptors, expressed on their surface in humans.<sup>83</sup> Platelets interfere in atherosclerosis in each of its phases—initiation, progression, and late complications.<sup>84–86</sup>

*In vivo*, thrombin-activation of human platelets results in the rapid activation and maximal expression of CD40 ligand (CD40L) on their surface.<sup>87</sup> CD40L is a TNF family protein, expressed on many cell types including platelets, and it binds to CD40 thus forming a trimer, named CD40/CD40L dyad. This established system potentiates downstream of atherogenic signals in the arterial vessel wall constituents, such as EC, VSMC, and monocytes. Downstream signalling of CD40 is mediated by the so called TNF receptor-associated factors which are able to recruit kinases and other effectors, which subsequently lead to the activation of NF- $\kappa$ B pathway, and thus induce the upregulation of various adhesion molecules, matrix metalloproteinases (such as MMPs 1,2,3,9,11,13), cytokines, and growth factors.<sup>88</sup>

MCP-1 is induced upon transient interactions of thrombin-stimulated platelets with the endothelium.<sup>89</sup> These pro-inflammatory events, related to MCP-1 production, are observed in VSMC *in vitro* too, probably contributing to VSMC migration and proliferation into the atherosclerotic plaques.<sup>90</sup> Thrombin is also known to induce IL-1 $\beta$  expression under *in vitro* conditions, both by EC<sup>91</sup> and platelets.<sup>92</sup>

An additional number of thrombin-induced platelet mediators, such as platelet factor-4 (PF-4), RANTES (Regulated upon Activation, Normal T-cell Expressed, and Secreted/CCL5),<sup>93</sup> and neutrophil-activating peptide (NAP)-2<sup>94</sup> are deposited by activated platelets on the endothelium to support leucocyte arrest and to favour the subsequent transmigration events. PF-4 (CXCL4) is a small chemokine also found in atherosclerotic lesions where its concentration correlates with severity of the plaques.<sup>95</sup> PF-4 protects monocytes against apoptosis and induces their differentiation,<sup>96</sup> whereas it serves as a stimulator of oxidative stress in macrophages.<sup>97</sup>

Aside from its vessel wall-related oxidative activities, a recent study provides evidence for the role of thrombin in evoking apoptosis in human platelets *in vitro*.<sup>98</sup> It was demonstrated that apoptosis was induced via H<sub>2</sub>O<sub>2</sub> production, mediated by mitochondrial cytochrome *c* release and the activation of caspase-9, leading to caspase-3 activation and ultimately to phosphatidylserine (PS) exposure. On the other hand, it is well known that MPs are mainly released from cells upon activation or apoptosis. Moreover, increased number of circulation procoagulant MPs are positively associated with the initiation and dissemination of pro-inflammatory processes but also with the severity of CVD.<sup>99</sup>

In conclusion, thrombin appears to have an important role in platelet-mediated pro-inflammatory cascades, resulting in a stimulation of ICAM-1, VCAM-1, E-selectin, and MMPs

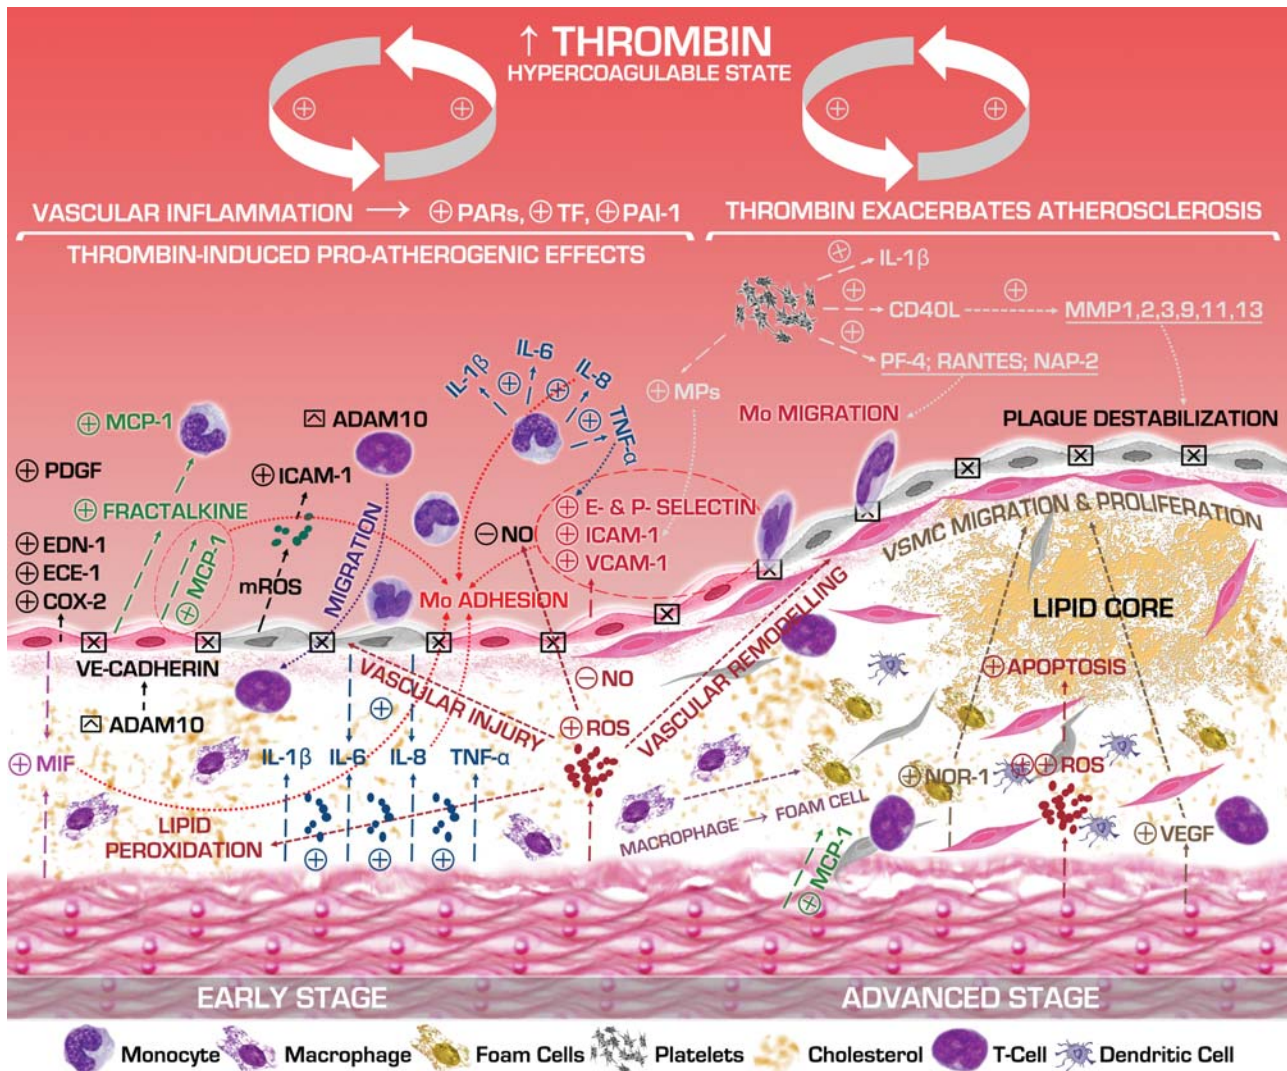

**Figure 4** Proposed mechanism for thrombin-induced atherogenesis. All known thrombin-induced pro-atherogenic actions are depicted in a consecutive way, showing its impact throughout the different stages of atherosclerotic development. Square with inverted 'V' indicates activation; encircled plus symbol indicates induction; upward arrow indicates elevated levels; MCP-1, monocyte chemoattractant protein-1; PDGF, platelet-derived growth factor; EDN-1, endothelin-1 gene; ECE-1, endothelin converting enzyme-1 gene; COX-2, cyclooxygenase-2; MIF, migration inhibiting factor; ADAM10, A Disintegrin And Metalloproteinase protein-10; ROS, reactive oxygen species; mROS, mitochondrial-derived reactive oxygen species; IL, interleukin; TNF- $\alpha$ , tumour necrosis factor- $\alpha$ ; Mo, monocyte; NO, nitric oxide; ICAM-1, intercellular cell adhesion molecule-1; VCAM-1, vascular cell adhesion molecule-1; MPs, microparticles; CD40L, CD40 Ligand; MMP, matrix metalloproteinases; PF-4, platelet factor-4; RANTES, Regulated upon Activation, Normal T-Cell Expressed, and Secreted; NAP-2, neutrophil-activating peptide-2; NOR-1, neuron-derived orphan receptor-1; VEGF, vascular endothelial growth factor; PARs, protease-activated receptors; TF, tissue factor; PAI-1, plasminogen activator inhibitor-1.

production, all processes that contribute to plaque progression, subsequent destabilization, and rupture.<sup>88,100–102</sup>

## 5.2. Thrombin and VSMC migration and proliferation

Besides its functions in the regulation of vascular tone, thrombin mediates migration, proliferation, and hypertrophy of VSMC. VSMC are known to express PAR-1, -2, and -4 thus potentiating the effect of thrombin in the activation of VSMC proliferation and migration.<sup>103</sup> Multiple studies report on situations associated with changes in the expression of PARs in VSMC. We have to take into consideration that the upregulation of these receptors might be as crucial as the direct effect of thrombin alone, because of the fact that they are the main mediators for its further actions. Hence, an upregulation of PAR-1 in human and rat

VSMC *in vivo* is demonstrated upon the release of multiple platelet-derived products (PDP) such as transforming growth factor (TGF)- $\beta_1$ , platelet-derived growth factor<sub>AB</sub> (PDGF<sub>AB</sub>) and to a lesser extent, serotonin.<sup>104</sup> Thus a long-term generation of new thrombin receptors at sites of vascular injury might consolidate that thrombin amplifies its pro-atherogenic actions throughout the development of a vascular lesion. Moreover, PAR-1 expression seems responsive to physical stress in both human and rat aortic VSMCs *in vitro*—being enhanced when cyclic strain is applied<sup>43</sup> and being inhibited upon stimulation with high shear stress.<sup>105</sup> This substantiates the idea that VSMC requires physical stimulation (flow or strain) in order to maintain vessel wall homeostasis, and perturbation of this process may be involved in atherosclerosis where an overexpression of PAR-1 and PAR-2 receptors has been demonstrated.<sup>21–23</sup>

Wang *et al.* studied thrombin-induced VSMC migration in cultured VSMC and demonstrated that the process is p38-MAPK-mediated upon the generation of ROS. Maruyama *et al.*<sup>106</sup> indicated that thrombin-induced proliferation in cultured human VSMC is regulated by NF- $\kappa$ B. VSMC proliferation appears to be regulated by neuron-derived orphan receptor-1 (NOR-1), a transcription factor overexpressed in human atherosclerotic plaques upon stimulation with thrombin.<sup>107</sup>

Finally, the regulation of PDGF in the endothelium also appears to be linked to thrombin. PDGF is related to atherosclerosis for its properties to stimulate VSMC migration and proliferation. PDGF levels rise upon treatment with thrombin of human umbilical vein EC, together with monocyte transmigration and E-selectin expression.<sup>108</sup>

### 5.3. Thrombin and its pro-angiogenic responses

Neovascularization is closely associated with plaque progression. Intraplaque haemorrhage is currently considered a critical factor for plaque destabilization and is predominantly attributed to the neovascularization of the intima and media by disorganized and immature 'leaky' microvessels.<sup>109</sup> Thrombin promotes angiogenesis both *in vitro* and *in vivo*.<sup>110</sup> It is indicated that it reduces the ability of EC to affix to their anchorage on the basement membrane, thereby promoting early angiogenic events.<sup>111</sup> Furthermore, it has been stated that thrombin increases the mRNA and protein levels of  $\alpha_v\beta_3$ -integrin in a concentration-dependent manner in EC.<sup>112</sup>  $\alpha_v\beta_3$ -integrin is a known angiogenic marker in vascular tissue and it directly interacts with thrombin, thereby facilitating EC attachment, migration, and survival.  $\alpha_v\beta_3$ -integrin also mediates progelatinase A (MMP-2) activation. Stimulation with thrombin has shown the induction of MMP-2 release in both human EC<sup>113</sup> and rat aorta in a dose-dependent mode *in vitro*.<sup>114</sup> In addition, thrombin augments the expression of vascular endothelial growth factor (VEGF) and angiopoietin-2 via PAR-1-mediated mechanism.<sup>115,116</sup> Finally, various studies indicate a relevant role for hypoxia-inducible factor-1 $\alpha$  signalling pathway in the thrombin-induced VEGF gene expression and angiogenesis.

### 6. Thrombin and atherosclerosis—in vivo animal studies

Despite the wealth of existing data on thrombin's pro-atherogenic actions *in vitro*, we should point out that many of these studies have been carried out with cell cultures and purified thrombin, in the absence of receptors and inhibitors, such that the relevance of any of these outcomes may be debated. However, the critical role of thrombin in atherogenesis is supported by recent *in vivo* studies.

Indirect evidence shows that heterozygous tissue factor pathway inhibitor (TFPI)-deficient ApoE<sup>-/-</sup> mice exhibited a significantly greater atherosclerotic burden compared with TFPI wild-type genotype.<sup>117</sup> TFPI is a potent inhibitor of TF-mediated thrombin generation.

Direct evidence for the involvement of thrombin comes from experiments in which the administration of the direct thrombin inhibitor melagatran to ApoE<sup>-/-</sup> mice reduced lesion progression in brachiocephalic arteries. Total lesion area was significantly decreased in melagatran-treated animals. Thrombin inhibition also contributed to plaque

stability (significant increase of immunohistochemical staining against VSMC  $\alpha$ -actin), characterized by thicker fibrous caps, increased media thickness, smaller necrotic cores, and a significant decrease of staining against MMP-9.<sup>118</sup> MMP-9 is considered an important catalyser of plaque rupture.

Finally, in a study employing transgenic double knock-out mice, deficient for HCII, a natural thrombin inhibitor, on a ApoE<sup>-/-</sup> background, HCII deficiency was associated with approximately 64% larger total plaque area and increased neointimal formation than in wild-type mice. In support of these findings, the administration of dermatan sulfate, which potentiates the inhibitory function of HCII about 10 000-fold, showed a HCII-dependent antiproliferative effect in wild-type animals.<sup>119</sup>

### 7. Clinical studies

Thrombin's impact on atherosclerotic development is a relatively novel topic to investigate and no specific clinical trials have been conducted yet. However, several reports indirectly demonstrate its importance with regard to CVD progression.

Aihara *et al.*<sup>120</sup> found a negative correlation between plasma HCII activity and ultrasound imaged plaque thickness of the carotid arteries in 306 elderly Japanese patients and suggested that HCII inhibits atherogenesis, thereby also showing a possible indirect link between higher thrombin generation and atherosclerosis progression.

Moreover, various thrombotic markers measured upon progressive CVD, indicate an indirect link for thrombin and atherosclerosis. The Cardiovascular Health Study (CHS) showed that prothrombin fragments F1-2 (F1-2) and fibrinopeptide A measured in 5201 individuals (399 free of CVD), which are markers for thrombin generation *in vivo*, correlated with various CVD risk factors such as triglycerides, C-reactive protein, low ankle-brachial pressure index (ABPI), etc.<sup>121</sup> F1-2 plasma levels were also independently associated with carotid intima-media thickness in a population of 181 middle-aged adults, free of clinically overt atherosclerosis.<sup>122</sup> Moreover, Nylaende *et al.* studied the relationship of prothrombotic activity and the severity of peripheral arterial occlusive disease (PAD). Multiple haemostatic markers such as vWF, soluble TM, soluble TF, TAT complex, and D-dimer were determined in a cross-sectional study of 127 patients, diagnosed with PAD. Plasma levels of D-dimer, TAT complex, and fibrinogen significantly correlated with the severity of atherosclerotic burden, evaluated by maximum treadmill walking distance and ABPI.<sup>123</sup> A recent meta-analysis of 191 studies, investigating seven common haemostatic gene polymorphisms in CVD, indicated that the 1691A variant of the factor V gene and 20210A variant of the prothrombin gene, both of which promote thrombin generation in blood, might be associated with the risk of CAD.<sup>124</sup> Moreover, it was recently shown that long after acute myocardial infarction, patients generate higher, earlier, and faster thrombin in comparison with chronic CAD patients.<sup>125</sup> This strengthens the concept of vulnerable atherosclerotic plaques contributing to the propagation of thrombin generation, thereby leading to aggravation of CVD.

Several more indirect cross-relations might be of interest in this context. Numerous clinical trials postulate that



haemostatic factors such as fibrinogen, C-reactive protein, plasminogen activator inhibitor-1 (PAI-1) are risk factors for CVD progression.<sup>126</sup> A recent study associated the progression of symptomatic intracranial large artery atherosclerosis with a pro-inflammatory state and impaired fibrinolysis, characterized with elevated concentrations of the endogenous fibrinolysis inhibitor PAI-1.<sup>127</sup> Despite the fact that thrombin is not a sole mediator of PAI-1 it induces its expression together with TF<sup>128,129</sup> in EC *in vitro*. TF and PAI-1 are already recognized for their pro-inflammatory features. In addition, many studies demonstrate a relationship between elevated PAI-1 levels and the development of atherosclerosis, not only systemically but also locally.<sup>130</sup>

Leucocytosis, and high neutrophil count in particular, may represent another intriguing mechanism for enhancing chronic atherosclerosis via maintaining a hypercoagulable state in CVD patients.<sup>131</sup> Neutrophils are a pivotal link between inflammation and coagulation. They produce multiple procoagulant factors and are able to release diverse matrix-destabilizing enzymes (elastase, cathepsin G), which easily activate the coagulation system.<sup>132</sup> They contribute to the liberation of TF-laden MPs into the blood stream upon stimulation with cytokines and consequent platelet adhesion via P-selectin.<sup>132</sup> This seems another potential mechanism for a continuous thrombin generation *in vivo*, facilitating the amplification of thrombin's pro-atherogenic features.

## 8. Summary and Perspectives

From histological studies an intense interaction between coagulation, inflammation, and the complex process of atherosclerosis has emerged.<sup>133</sup> Advanced atherosclerotic lesions show evidence of the presence of active coagulation products including fibrin and fibrin cleavage products. Hence, the presence of an active coagulation cascade within the arterial vessel wall seems likely and our recent immunohistochemical data show that essentially all coagulation proteins are detectable in the atherosclerotic lesion.<sup>134</sup> In the coagulation cascade we and others consider the generation of thrombin as one of the key regulating events. *In vivo*, thrombin is thought to be continuously generated as indicated by measurable quantities of F1-2 and TAT complexes in the plasma of normal individuals. Physiologically, the generation of thrombin is the product of synthesis under influence of TF and inhibition by several inhibitors including AT and HCII. The net amount of thrombin will be determined by the rate of synthesis and inactivation, the localization (free or bound to surfaces), and its associated binding to receptors including PARs and TM. Upon progressive atherosclerosis, there is a diminution in the level of TM at the endothelium,<sup>1</sup> which impairs the anticoagulant action of thrombin and the increased production of thrombin because of TF exposure allows interactions of thrombin with components of the arterial vessel wall, including dysfunctional EC on both initial and advanced lesions and other cell types in ruptured (thrombotic) plaques.

The continuous generation of mostly procoagulant thrombin may contribute to a vicious circle in the thrombin-induced atherogenesis process. As discussed, thrombin acts mostly via PARs, inducing multiple vascular pro-inflammatory reactions. The authors are aware that also

other coagulation proteases including factor VIIa, factor Xa, and APC contain PAR-activation properties that may interfere with or add to the actions of thrombin. There has indeed been a public debate on the preference of thrombin vis-à-vis APC in their binding to PAR-1 and this debate has not yet been settled.<sup>135</sup> Atherosclerotic alterations in the vessel wall are known to increase the level of expressed PARs on the surface of most vessel wall constituents.<sup>21-23</sup> Thrombin-mediated pro-inflammatory events are a powerful trigger for more thrombin formation, which may eventually amplify its contribution to further atherosclerotic progression.

Finally, from a clinical perspective the introduction of a number of selective oral anticoagulants that will also be aimed for long-term administration makes it of actual importance to consider the effects and possible side-effects of thrombin inhibition on the extent and nature of atherosclerosis. Hopefully, thrombin inhibition is, as predicted from animal experiments, associated with a favourable change in atherosclerosis phenotype. However, the typical Janus face of many clotting proteases should warn against overt enthusiasm and calls for prospective clinical studies.

## Acknowledgements

S.H. participates in the European Vascular Genomics Network (<http://www.evgn.org>), a Network of Excellence supported by the European Community's Sixth Framework Program for Research Priority 1 (Life Sciences, Genomics, and Biotechnology for Health; contract LSHM-CT-2003-503254).

## Funding

EU Marie Curie Fellowship (MEST-CT-2005-020706 to J.I.B.).

**Conflict of interest:** none declared.

## References

1. Esmon CT. The interactions between inflammation and coagulation. *Br J Haematol* 2005; **131**:417-430.
2. Levi M, van der Poll T. Two-way interactions between inflammation and coagulation. *Trends Cardiovasc Med* 2005; **15**:254-259.
3. Ku DD, Zaleski JK. Receptor mechanism of thrombin-induced endothelium-dependent and endothelium-independent coronary vascular effects in dogs. *J Cardiovasc Pharmacol* 1993; **22**:609-616.
4. Mizuno O, Hirano K, Nishimura J, Kubo C, Kanaide H. Mechanism of endothelium-dependent relaxation induced by thrombin in the pig coronary artery. *Eur J Pharmacol* 1998; **351**:67-77.
5. Hamilton JR, Cocks TM. Heterogeneous mechanisms of endothelium-dependent relaxation for thrombin and peptide activators of protease-activated receptor-1 in porcine isolated coronary artery. *Br J Pharmacol* 2000; **130**:181-188.
6. Gudmundsdottir IJ, Lang NN, Boon NA, Ludlam CA, Webb DJ, Fox KA *et al.* Role of the endothelium in the vascular effects of the thrombin receptor (protease-activated receptor type 1) in humans. *J Am Coll Cardiol* 2008; **51**:1749-1756.
7. Hirano K. The roles of proteinase-activated receptors in the vascular physiology and pathophysiology. *Arterioscler Thromb Vasc Biol* 2007; **27**:27-36.
8. Lane DA, Philippou H, Huntington JA. Directing thrombin. *Blood* 2005; **106**:2605-2612.
9. Kataoka H, Hamilton JR, McKemy DD, Camerer E, Zheng YW, Cheng A *et al.* Protease-activated receptors 1 and 4 mediate thrombin signaling in endothelial cells. *Blood* 2003; **102**:3224-3231.
10. Derkach DN, Ihara E, Hirano K, Nishimura J, Takahashi S, Kanaide H. Thrombin causes endothelium-dependent biphasic regulation of

- vascular tone in the porcine renal interlobar artery. *Br J Pharmacol* 2000;**131**:1635–1642.
11. Watts VL, Motley ED. Role of protease-activated receptor-1 in endothelial nitric oxide synthase-Thr495 phosphorylation. *Exp Biol Med (Maywood)* 2009;**234**:132–139.
  12. Ming XF, Viswambharan H, Barandier C, Ruffieux J, Kaibuchi K, Rusconi S *et al*. Rho GTPase/Rho kinase negatively regulates endothelial nitric oxide synthase phosphorylation through the inhibition of protein kinase B/Akt in human endothelial cells. *Mol Cell Biol* 2002;**22**:8467–8477.
  13. Eto M, Barandier C, Rathgeb L, Kozai T, Joch H, Yang Z *et al*. Thrombin suppresses endothelial nitric oxide synthase and upregulates endothelin-converting enzyme-1 expression by distinct pathways: role of Rho/ROCK and mitogen-activated protein kinase. *Circ Res* 2001;**89**:583–590.
  14. Ming XF, Barandier C, Viswambharan H, Kwak BR, Mach F, Mazzolai L *et al*. Thrombin stimulates human endothelial arginase enzymatic activity via RhoA/ROCK pathway: implications for atherosclerotic endothelial dysfunction. *Circulation* 2004;**110**:3708–3714.
  15. Yang L, Lewis CM, Chandrasekharan UM, Kinney CM, Dicorleto PE, Kashyap VS. Arginase activity is increased by thrombin: a mechanism for endothelial dysfunction in arterial thrombosis. *J Am Coll Surg* 2006;**203**:817–826.
  16. Lewis C, Zhu W, Pavkov ML, Kinney CM, Dicorleto PE, Kashyap VS. Arginase blockade lessens endothelial dysfunction after thrombosis. *J Vasc Surg* 2008;**48**:441–446.
  17. Zhang C, Hein TW, Wang W, Miller MW, Fossum TW, McDonald MM *et al*. Upregulation of vascular arginase in hypertension decreases nitric oxide-mediated dilation of coronary arterioles. *Hypertension* 2004;**44**:935–943.
  18. Delerive P, Martin-Nizard F, Chinetti G, Trottein F, Fruchart JC, Najib J *et al*. Peroxisome proliferator-activated receptor activators inhibit thrombin-induced endothelin-1 production in human vascular endothelial cells by inhibiting the activator protein-1 signaling pathway. *Circ Res* 1999;**85**:394–402.
  19. Hattton MW, Moar SL, Richardson M. Deendothelialization *in vivo* initiates a thrombogenic reaction at the rabbit aorta surface. Correlation of uptake of fibrinogen and antithrombin III with thrombin generation by the exposed subendothelium. *Am J Pathol* 1989;**135**:499–508.
  20. Merlini PA, Bauer KA, Oltrona L, Ardissino D, Cattaneo M, Belli C *et al*. Persistent activation of coagulation mechanism in unstable angina and myocardial infarction. *Circulation* 1994;**90**:61–68.
  21. Nelken NA, Soifer SJ, O'Keefe J, Vu TK, Charo IF, Coughlin SR. Thrombin receptor expression in normal and atherosclerotic human arteries. *J Clin Invest* 1992;**90**:1614–1621.
  22. Wilcox JN, Rodriguez J, Subramanian R, Ollerenshaw J, Zhong C, Hayzer DJ *et al*. Characterization of thrombin receptor expression during vascular lesion formation. *Circ Res* 1994;**75**:1029–1038.
  23. Ku DD, Dai J. Expression of thrombin receptors in human atherosclerotic coronary arteries leads to an exaggerated vasoconstrictory response *in vitro*. *J Cardiovasc Pharmacol* 1997;**30**:649–657.
  24. Ellis CA, Malik AB, Gilchrist A, Hamm H, Sandoval R, Voyno-Yasenetskaya T *et al*. Thrombin induces proteinase-activated receptor-1 gene expression in endothelial cells via activation of Gi-linked Ras/mitogen-activated protein kinase pathway. *J Biol Chem* 1999;**274**:13718–13727.
  25. Nystedt S, Ramakrishnan V, Sundelin J. The proteinase-activated receptor 2 is induced by inflammatory mediators in human endothelial cells. Comparison with the thrombin receptor. *J Biol Chem* 1996;**271**:14910–14915.
  26. Hamilton JR, Frauman AG, Cocks TM. Increased expression of protease-activated receptor-2 (PAR2) and PAR4 in human coronary artery by inflammatory stimuli unveils endothelium-dependent relaxations to PAR2 and PAR4 agonists. *Circ Res* 2001;**89**:92–98.
  27. Nguyen KT, Eskin SG, Patterson C, Runge MS, McIntire LV. Shear stress reduces protease activated receptor-1 expression in human endothelial cells. *Ann Biomed Eng* 2001;**29**:145–152.
  28. Rabiet MJ, Plantier JL, Rival Y, Lampugnani MG, Dejana E. Thrombin-induced increase in endothelial permeability is associated with changes in cell-to-cell junction organization. *Arterioscler Thromb Vasc Biol* 1996;**16**:488–496.
  29. Vuong PT, Malik AB, Nagpala PG, Lum H. Protein kinase C beta modulates thrombin-induced Ca<sup>2+</sup> signaling and endothelial permeability increase. *J Cell Physiol* 1998;**175**:379–387.
  30. Nobe K, Sone T, Paul RJ, Honda K. Thrombin-induced force development in vascular endothelial cells: contribution to alteration of permeability mediated by calcium-dependent and -independent pathways. *J Pharmacol Sci* 2005;**99**:252–263.
  31. Schulz B, Pruessmeyer J, Maretzky T, Ludwig A, Blobel CP, Saftig P *et al*. ADAM10 regulates endothelial permeability and T-Cell transmigration by proteolysis of vascular endothelial cadherin. *Circ Res* 2008;**102**:1192–1201.
  32. Sapet C, Simoncini S, Lloriod B, Puthier D, Sampol J, Nguyen C *et al*. Thrombin-induced endothelial microparticle generation: identification of a novel pathway involving ROCK-II activation by caspase-2. *Blood* 2006;**108**:1868–1876.
  33. Bernal-Mizrachi L, Jy W, Fierro C, Macdonough R, Velazques HA, Purow J *et al*. Endothelial microparticles correlate with high-risk angiographic lesions in acute coronary syndromes. *Int J Cardiol* 2004;**97**:439–446.
  34. Harrison D, Griendling KK, Landmesser U, Hornig B, Drexler H. Role of oxidative stress in atherosclerosis. *Am J Cardiol* 2003;**91**:7A–11A.
  35. Brandes RP, Viedt C, Nguyen K, Beer S, Kreuzer J, Busse R *et al*. Thrombin-induced MCP-1 expression involves activation of the p22phox-containing NADPH oxidase in human vascular smooth muscle cells. *Thromb Haemost* 2001;**85**:1104–1110.
  36. Gorkach A, Diebold I, Schiner-Kerth VB, Berchner-Pfannschmidt U, Roth U, Brandes RP *et al*. Thrombin activates the hypoxia-inducible factor-1 signaling pathway in vascular smooth muscle cells: Role of the p22(phox)-containing NADPH oxidase. *Circ Res* 2001;**89**:47–54.
  37. Wachowicz B, Olas B, Zbikowska HM, Buczynski A. Generation of reactive oxygen species in blood platelets. *Platelets* 2002;**13**:175–182.
  38. Griendling KK, Sorescu D, Ushio-Fukai M. NAD(P)H oxidase: role in cardiovascular biology and disease. *Circ Res* 2000;**86**:494–501.
  39. Herkert O, Diebold I, Brandes RP, Hess J, Busse R, Gorkach A. NADPH oxidase mediates tissue factor-dependent surface procoagulant activity by thrombin in human vascular smooth muscle cells. *Circulation* 2002;**105**:2030–2036.
  40. Kanda Y, Mizuno K, Kuroki Y, Watanabe Y. Thrombin-induced p38 mitogen-activated protein kinase activation is mediated by epidermal growth factor receptor transactivation pathway. *Br J Pharmacol* 2001;**132**:1657–1664.
  41. Djordjevic T, Pogrebniak A, BelAiba RS, Bonello S, Wotzlaw C, Acker H *et al*. The expression of the NADPH oxidase subunit p22phox is regulated by a redox-sensitive pathway in endothelial cells. *Free Radic Biol Med* 2005;**38**:616–630.
  42. Li F, Baykal D, Haraist C, Yan CN, Carr BN, Rao GN *et al*. Cloning and identification of regulatory sequences of the human thrombin receptor gene. *J Biol Chem* 1996;**271**:26320–26328.
  43. Nguyen KT, Frye SR, Eskin SG, Patterson C, Runge MS, McIntire LV. Cyclic strain increases protease-activated receptor-1 expression in vascular smooth muscle cells. *Hypertension* 2001;**38**:1038–1043.
  44. Hawkins BJ, Solt LA, Chowdhury I, Kazi AS, Abid MR, Aird WC *et al*. G protein-coupled receptor Ca<sup>2+</sup>-linked mitochondrial reactive oxygen species are essential for endothelial/leukocyte adherence. *Mol Cell Biol* 2007;**27**:7582–7593.
  45. Martorell L, Martinez-Gonzalez J, Rodriguez C, Gentile M, Calvayrac O, Badimon L. Thrombin and protease-activated receptors (PARs) in atherothrombosis. *Thromb Haemost* 2008;**99**:305–315.
  46. Colotta F, Sciacca FL, Sironi M, Luini W, Rabiet MJ, Mantovani A. Expression of monocyte chemoattractant protein-1 by monocytes and endothelial cells exposed to thrombin. *Am J Pathol* 1994;**144**:975–985.
  47. Nelken NA, Coughlin SR, Gordon D, Wilcox JN. Monocyte chemoattractant protein-1 in human atherosclerotic plaques. *J Clin Invest* 1991;**88**:1121–1127.
  48. Kranzhofer R, Clinton SK, Ishii K, Coughlin SR, Fenton JW II, Libby P. Thrombin potently stimulates cytokine production in human vascular smooth muscle cells but not in mononuclear phagocytes. *Circ Res* 1996;**79**:286–294.
  49. Popovic M, Laumonier Y, Burysek L, Syrovets T, Simmet T. Thrombin-induced expression of endothelial CX3CL1 potentiates monocyte CCL2 production and transendothelial migration. *J Leukoc Biol* 2008;**84**:215–223.
  50. Okada M, Suzuki K, Takada K, Nakashima M, Nakanishi T, Shinohara T. Detection of up-regulated genes in thrombin-stimulated human umbilical vein endothelial cells. *Thromb Res* 2006;**118**:715–721.
  51. Szaba FM, Smiley ST. Roles for thrombin and fibrin(ogen) in cytokine/chemokine production and macrophage adhesion *in vivo*. *Blood* 2002;**99**:1053–1059.
  52. Chen D, Carpenter A, Abrahams J, Chambers RC, Lechler RI, McVey JH *et al*. Protease-activated receptor 1 activation is necessary for monocyte chemoattractant protein 1-dependent leukocyte recruitment *in vivo*. *J Exp Med* 2008;**205**:1739–1746.

53. Marin V, Montero-Julian FA, Gres S, Boulay V, Bongrand P, Farnarier C *et al.* The IL-6-soluble IL-6Ralpha autocrine loop of endothelial activation as an intermediate between acute and chronic inflammation: an experimental model involving thrombin. *J Immunol* 2001;167:3435–3442.
54. Tokunou T, Ichiki T, Takeda K, Funakoshi Y, Iino N, Shimokawa H *et al.* Thrombin induces interleukin-6 expression through the cAMP response element in vascular smooth muscle cells. *Arterioscler Thromb Vasc Biol* 2001;21:1759–1763.
55. Huber SA, Sakkinen P, Conze D, Hardin N, Tracy R. Interleukin-6 exacerbates early atherosclerosis in mice. *Arterioscler Thromb Vasc Biol* 1999;19:2364–2367.
56. Marin V, Farnarier C, Gres S, Kaplanski S, Su MS, Dinarello CA *et al.* The p38 mitogen-activated protein kinase pathway plays a critical role in thrombin-induced endothelial chemokine production and leukocyte recruitment. *Blood* 2001;98:667–673.
57. Gerszten RE, Garcia-Zepeda EA, Lim YC, Yoshida M, Ding HA, Gimbrone MA Jr *et al.* MCP-1 and IL-8 trigger firm adhesion of monocytes to vascular endothelium under flow conditions. *Nature* 1999;398:718–723.
58. Aukrust P, Halvorsen B, Yndestad A, Ueland T, Oie E, Otterdal K *et al.* Chemokines and cardiovascular risk. *Arterioscler Thromb Vasc Biol* 2008;28:1909–1919.
59. Shimizu T, Nishihira J, Watanabe H, Abe R, Honda A, Ishibashi T *et al.* Macrophage migration inhibitory factor is induced by thrombin and factor Xa in endothelial cells. *J Biol Chem* 2004;279:13729–13737.
60. Bernhagen J, Krohn R, Lue H, Gregory JL, Zerneck A, Koenen RR *et al.* MIF is a noncognate ligand of CXC chemokine receptors in inflammatory and atherogenic cell recruitment. *Nat Med* 2007;13:587–596.
61. Dong ZM, Chapman SM, Brown AA, Frenette PS, Hynes RO, Wagner DD. The combined role of P- and E-selectins in atherosclerosis. *J Clin Invest* 1998;102:145–152.
62. Kaplanski G, Fabrigoule M, Boulay V, Dinarello CA, Bongrand P, Kaplanski S *et al.* Thrombin induces endothelial type II activation *in vitro*: IL-1 and TNF-alpha-independent IL-8 secretion and E-selectin expression. *J Immunol* 1997;158:5435–5441.
63. Ostrovsky L, Carvalho-Tavares J, Woodman RC, Kubes P. Translational inhibition of E-selectin expression stimulates P-selectin-dependent neutrophil recruitment. *Am J Physiol Heart Circ Physiol* 2000;278:H1225–H1232.
64. Kaur J, Woodman RC, Kubes P. P38 MAPK: critical molecule in thrombin-induced NF-kappa B-dependent leukocyte recruitment. *Am J Physiol Heart Circ Physiol* 2003;284:H1095–H1103.
65. Sugama Y, Malik AB. Thrombin receptor 14-amino acid peptide mediates endothelial hyperadhesivity and neutrophil adhesion by P-selectin-dependent mechanism. *Circ Res* 1992;71:1015–1019.
66. Cleator JH, Zhu WQ, Vaughan DE, Hamm HE. Differential regulation of endothelial exocytosis of P-selectin and von Willebrand factor by protease-activated receptors and cAMP. *Blood* 2006;107:2736–2744.
67. Davies MJ, Gordon JL, Gearing AJ, Pigott R, Woolf N, Katz D *et al.* The expression of the adhesion molecules ICAM-1, VCAM-1, PECAM, and E-selectin in human atherosclerosis. *J Pathol* 1993;171:223–229.
68. Braunersreuther V, Mach F. Leukocyte recruitment in atherosclerosis: potential targets for therapeutic approaches? *Cell Mol Life Sci* 2006;63:2079–2088.
69. Kaplanski G, Marin V, Fabrigoule M, Boulay V, Benoliel AM, Bongrand P *et al.* Thrombin-activated human endothelial cells support monocyte adhesion *in vitro* following expression of intercellular adhesion molecule-1 (ICAM-1; CD54) and vascular cell adhesion molecule-1 (VCAM-1; CD106). *Blood* 1998;92:1259–1267.
70. Minami T, Sugiyama A, Wu SQ, Abid R, Kodama T, Aird WC. Thrombin and phenotypic modulation of the endothelium. *Arterioscler Thromb Vasc Biol* 2004;24:41–53.
71. Minami T, Abid MR, Zhang J, King G, Kodama T, Aird WC. Thrombin stimulation of vascular adhesion molecule-1 in endothelial cells is mediated by protein kinase C (PKC)-delta-NF-kappa B and PKC-zeta-GATA signaling pathways. *J Biol Chem* 2003;278:6976–6984.
72. Anwar KN, Fazal F, Malik AB, Rahman A. RhoA/Rho-associated kinase pathway selectively regulates thrombin-induced intercellular adhesion molecule-1 expression in endothelial cells via activation of I kappa B kinase beta and phosphorylation of RelA/p65. *J Immunol* 2004;173:6965–6972.
73. Bijli KM, Fazal F, Minhajuddin M, Rahman A. Activation of Syk by PKC delta regulates thrombin-induced ICAM-1 expression in endothelial cells via tyrosine phosphorylation of RelA/p65. *J Biol Chem* 2008;283:14674–14684.
74. Miho N, Ishida T, Kuwaba N, Ishida M, Shimote-Abe K, Tabuchi K *et al.* Role of the JNK pathway in thrombin-induced ICAM-1 expression in endothelial cells. *Cardiovasc Res* 2005;68:289–298.
75. Sandoval R, Malik AB, Minshall RD, Kouklis P, Ellis CA, Tiruppathi C. Ca(2+) signalling and PKCalpha activate increased endothelial permeability by disassembly of VE-cadherin junctions. *J Physiol* 2001;533:433–445.
76. Vanhauwe JF, Thomas TO, Minshall RD, Tiruppathi C, Li A, Gilchrist A *et al.* Thrombin receptors activate G(o) proteins in endothelial cells to regulate intracellular calcium and cell shape changes. *J Biol Chem* 2002;277:34143–34149.
77. Vouret-Craviari V, Bourcier C, Boulter E, van Obberghen-Schilling E. Distinct signals via Rho GTPases and Src drive shape changes by thrombin and sphingosine-1-phosphate in endothelial cells. *J Cell Sci* 2002;115:2475–2484.
78. van Nieuw Amerongen GP, Beckers CM, Achekar ID, Zeeman S, Musters RJ, van Hinsbergh VW. Involvement of Rho kinase in endothelial barrier maintenance. *Arterioscler Thromb Vasc Biol* 2007;27:2332–2339.
79. van Nieuw Amerongen GP, Musters RJ, Eringa EC, Sipkema P, van Hinsbergh VW. Thrombin-induced endothelial barrier disruption in intact microvessels. *Am J Physiol Cell Physiol* 2008;294:C1234–C1234.
80. Colognato R, Slupsky JR, Jendrach M, Burysek L, Syrovets T, Simmet T. Differential expression and regulation of protease-activated receptors in human peripheral monocytes and monocyte-derived antigen-presenting cells. *Blood* 2003;102:2645–2652.
81. Li T, Wang H, He S. Induction of interleukin-6 release from monocytes by serine proteinases and its potential mechanisms. *Scand J Immunol* 2006;64:10–16.
82. Virmani R, Kolodgie FD, Burke AP, Farb A, Schwartz SM. Lessons from sudden coronary death: a comprehensive morphological classification scheme for atherosclerotic lesions. *Arterioscler Thromb Vasc Biol* 2000;20:1262–1275.
83. Kahn ML, Zheng YW, Huang W, Bigornia V, Zeng D, Moff S *et al.* A dual thrombin receptor system for platelet activation. *Nature* 1998;394:690–694.
84. Massberg S, Brand K, Gruner S, Page S, Muller E, Muller I *et al.* A critical role of platelet adhesion in the initiation of atherosclerotic lesion formation. *J Exp Med* 2002;196:887–896.
85. Gawaz M. Platelets in the onset of atherosclerosis. *Blood Cells Mol Dis* 2006;36:206–210.
86. May AE, Seizer P, Gawaz M. Platelets: inflammatory firebugs of vascular walls. *Arterioscler Thromb Vasc Biol* 2008;28:s5–s10.
87. Henn V, Slupsky JR, Grafe M, Anagnostopoulos I, Forster R, Muller-Berghaus G *et al.* CD40 ligand on activated platelets triggers an inflammatory reaction of endothelial cells. *Nature* 1998;391:591–594.
88. Lutgens E, Lievens D, Beckers L, Donners M, Daemen M. CD40 and its ligand in atherosclerosis. *Trends Cardiovasc Med* 2007;17:118–123.
89. Dickfeld T, Lengyel E, May AE, Massberg S, Brand K, Page S *et al.* Transient interaction of activated platelets with endothelial cells induces expression of monocyte-chemoattractant protein-1 via a p38 mitogen-activated protein kinase mediated pathway. Implications for atherogenesis. *Cardiovasc Res* 2001;49:189–199.
90. Massberg S, Vogt F, Dickfeld T, Brand K, Page S, Gawaz M. Activated platelets trigger an inflammatory response and enhance migration of aortic smooth muscle cells. *Thromb Res* 2003;110:187–194.
91. Gawaz M, Brand K, Dickfeld T, Pogatsa-Murray G, Page S, Bogner C *et al.* Platelets induce alterations of chemotactic and adhesive properties of endothelial cells mediated through an interleukin-1-dependent mechanism. Implications for atherogenesis. *Atherosclerosis* 2000;148:75–85.
92. Lindemann S, Tolley ND, Dixon DA, McIntyre TM, Prescott SM, Zimmerman GA *et al.* Activated platelets mediate inflammatory signaling by regulated interleukin 1beta synthesis. *J Cell Biol* 2001;154:485–490.
93. von Hundelshausen P, Weber KS, Huo Y, Proudfoot AE, Nelson PJ, Ley K *et al.* RANTES deposition by platelets triggers monocyte arrest on inflamed and atherosclerotic endothelium. *Circulation* 2001;103:1772–1777.
94. Piccardoni P, Evangelista V, Piccoli A, de Gaetano G, Walz A, Cerletti C. Thrombin-activated human platelets release two NAP-2 variants that stimulate polymorphonuclear leukocytes. *Thromb Haemost* 1996;76:780–785.
95. Pitsilos S, Hunt J, Mohler ER, Prabhakar AM, Poncz M, Dawicki J *et al.* Platelet factor 4 localization in carotid atherosclerotic plaques: correlation with clinical parameters. *Thromb Haemost* 2003;90:1112–1120.

96. Scheuerer B, Ernst M, Durrbaum-Landmann I, Fleischer J, Grage-Griebenow E, Brandt E *et al.* The CXCL4-chemokine platelet factor 4 promotes monocyte survival and induces monocyte differentiation into macrophages. *Blood* 2000;**95**:1158–1166.
97. Pervushina O, Scheuerer B, Reiling N, Behnke L, Schroder JM, Kasper B *et al.* Platelet factor 4/CXCL4 induces phagocytosis and the generation of reactive oxygen metabolites in mononuclear phagocytes independently of Gi protein activation or intracellular calcium transients. *J Immunol* 2004;**173**:2060–2067.
98. Lopez JJ, Salido GM, Gomez-Arteta E, Rosado JA, Pariente JA. Thrombin induces apoptotic events through the generation of reactive oxygen species in human platelets. *J Thromb Haemost* 2007;**5**:1283–1291.
99. George FD. Microparticles in vascular diseases. *Thromb Res* 2008;**122**(Suppl. 1):S55–S59.
100. Gawaz M, Neumann FJ, Dickfeld T, Koch W, Laugwitz KL, Adelsberger H *et al.* Activated platelets induce monocyte chemotactic protein-1 secretion and surface expression of intercellular adhesion molecule-1 on endothelial cells. *Circulation* 1998;**98**:1164–1171.
101. Schonbeck U, Libby P. The CD40/CD154 receptor/ligand dyad. *Cell Mol Life Sci* 2001;**58**:4–43.
102. Yu G, Rux AH, Ma P, Bdeir K, Sachais BS. Endothelial expression of E-selectin is induced by the platelet-specific chemokine platelet factor 4 through LRP in an NF-kappaB-dependent manner. *Blood* 2005;**105**:3545–3551.
103. McNamara CA, Sarembock IJ, Gimple LW, Fenton JW II, Coughlin SR, Owens GK. Thrombin stimulates proliferation of cultured rat aortic smooth muscle cells by a proteolytically activated receptor. *J Clin Invest* 1993;**91**:94–98.
104. Schini-Kerth VB, Bassus S, Fisslthaler B, Kirchmaier CM, Busse R. Aggregating human platelets stimulate the expression of thrombin receptors in cultured vascular smooth muscle cells via the release of transforming growth factor-beta1 and platelet-derived growth factor<sub>AB</sub>. *Circulation* 1997;**96**:3888–3896.
105. Papadaki M, Ruef J, Nguyen KT, Li F, Patterson C, Eskin SG *et al.* Differential regulation of protease activated receptor-1 and tissue plasminogen activator expression by shear stress in vascular smooth muscle cells. *Circ Res* 1998;**83**:1027–1034.
106. Maruyama I, Shigeta K, Miyahara H, Nakajima T, Shin H, Ide S *et al.* Thrombin activates NF-kappa B through thrombin receptor and results in proliferation of vascular smooth muscle cells: role of thrombin in atherosclerosis and restenosis. *Ann NY Acad Sci* 1997;**811**:429–436.
107. Martorell L, Rodriguez C, Calvayrac O, Gentile M, Badimon L, Martinez-Gonzalez J. Vascular effects of thrombin: involvement of NOR-1 in thrombin-induced mitogenic stimulus in vascular cells. *Front Biosci* 2008;**13**:2909–2915.
108. Shankar R, de la Motte CA, Poptick EJ, DiCorleto PE. Thrombin receptor-activating peptides differentially stimulate platelet-derived growth factor production, monocytic cell adhesion, and E-selectin expression in human umbilical vein endothelial cells. *J Biol Chem* 1994;**269**:13936–13941.
109. Virmani R, Kolodgie FD, Burke AP, Finn AV, Gold HK, Tulenko TN *et al.* Atherosclerotic plaque progression and vulnerability to rupture: angiogenesis as a source of intraplaque hemorrhage. *Arterioscler Thromb Vasc Biol* 2005;**25**:2054–2061.
110. Haralabopoulos GC, Grant DS, Kleinman HK, Maragoudakis ME. Thrombin promotes endothelial cell alignment in Matrigel *in vitro* and angiogenesis *in vivo*. *Am J Physiol* 1997;**273**:C239–C245.
111. Tsopanoglou NE, Maragoudakis ME. On the mechanism of thrombin-induced angiogenesis: inhibition of attachment of endothelial cells on basement membrane components. *Angiogenesis* 1998;**1**:192–200.
112. Tsopanoglou NE, Andriopoulou P, Maragoudakis ME. On the mechanism of thrombin-induced angiogenesis: involvement of alphavbeta3-integrin. *Am J Physiol Cell Physiol* 2002;**283**:C1501–C1510.
113. Maragoudakis ME, Kraniti N, Giannopoulou E, Alexopoulos K, Matsoukas J. Modulation of angiogenesis and progelatinase a by thrombin receptor mimetics and antagonists. *Endothelium* 2001;**8**:195–205.
114. Fernandez-Patron C, Zhang Y, Radomski MW, Hollenberg MD, Davidge ST. Rapid release of matrix metalloproteinase (MMP)-2 by thrombin in the rat aorta: modulation by protein tyrosine kinase/phosphatase. *Thromb Haemost* 1999;**82**:1353–1357.
115. Caunt M, Huang YQ, Brooks PC, Karpatkin S. Thrombin induces neoangiogenesis in the chick chorioallantoic membrane. *J Thromb Haemost* 2003;**1**:2097–2102.
116. Wang Z, Castresana MR, Newman WH. Reactive oxygen species-sensitive p38 MAPK controls thrombin-induced migration of vascular smooth muscle cells. *J Mol Cell Cardiol* 2004;**36**:49–56.
117. Westrick RJ, Bodary PF, Xu Z, Shen YC, Broze GJ, Eitzman DT. Deficiency of tissue factor pathway inhibitor promotes atherosclerosis and thrombosis in mice. *Circulation* 2001;**103**:3044–3046.
118. Bea F, Kreuzer J, Preusch M, Schaab S, Isermann B, Rosenfeld ME *et al.* Melagatran reduces advanced atherosclerotic lesion size and may promote plaque stability in apolipoprotein E-deficient mice. *Arterioscler Thromb Vasc Biol* 2006;**26**:2787–2792.
119. Vicente CP, He L, Tollefsen DM. Accelerated atherogenesis and neointima formation in heparin cofactor II deficient mice. *Blood* 2007;**110**:4261–4267.
120. Aihara K, Azuma H, Takamori N, Kanagawa Y, Akaike M, Fujimura M *et al.* Heparin cofactor II is a novel protective factor against carotid atherosclerosis in elderly individuals. *Circulation* 2004;**109**:2761–2765.
121. Cushman M, Psaty BM, Macy E, Bovill EG, Cornell ES, Kuller LH *et al.* Correlates of thrombin markers in an elderly cohort free of clinical cardiovascular disease. *Arterioscler Thromb Vasc Biol* 1996;**16**:1163–1169.
122. Paramo JA, Orbe J, Belouqui O, Benito A, Colina I, Martinez-Vila E *et al.* Prothrombin fragment 1+2 is associated with carotid intima-media thickness in subjects free of clinical cardiovascular disease. *Stroke* 2004;**35**:1085–1089.
123. Nylaende M, Kroese A, Strandén E, Morken B, Sandbaek G, Lindahl AK *et al.* Prothrombotic activity is associated with the anatomical as well as the functional severity of peripheral arterial occlusive disease. *Thromb Haemost* 2006;**95**:702–707.
124. Ye Z, Liu EH, Higgins JP, Keavney BD, Lowe GD, Collins R *et al.* Seven haemostatic gene polymorphisms in coronary disease: meta-analysis of 66,155 cases and 91,307 controls. *Lancet* 2006;**367**:651–658.
125. Orbe J, Zudaire M, Serrano R, Coma-Canella I, Martinez de Sarrondo S, Rodriguez JA *et al.* Increased thrombin generation after acute versus chronic coronary disease as assessed by the thrombin generation test. *Thromb Haemost* 2008;**99**:382–387.
126. Kannel WB. Overview of hemostatic factors involved in atherosclerotic cardiovascular disease. *Lipids* 2005;**40**:1215–1220.
127. Arenillas JF, Alvarez-Sabin J, Molina CA, Chacon P, Fernandez-Cadenas I, Ribo M *et al.* Progression of symptomatic intracranial large artery atherosclerosis is associated with a proinflammatory state and impaired fibrinolysis. *Stroke* 2008;**39**:1456–1463.
128. Eto M, Kozai T, Cosentino F, Joch H, Luscher TF. Statin prevents tissue factor expression in human endothelial cells: role of Rho/Rho-kinase and Akt pathways. *Circulation* 2002;**105**:1756–1759.
129. Takeya H, Gabazza EC, Aoki S, Ueno H, Suzuki K. Synergistic effect of sphingosine 1-phosphate on thrombin-induced tissue factor expression in endothelial cells. *Blood* 2003;**102**:1693–1700.
130. Aso Y. Plasminogen activator inhibitor (PAI)-1 in vascular inflammation and thrombosis. *Front Biosci* 2007;**12**:2957–2966.
131. Collier BS. Leukocytosis and ischemic vascular disease morbidity and mortality: is it time to intervene? *Arterioscler Thromb Vasc Biol* 2005;**25**:658–670.
132. Afshar-Kharghan V, Thiagarajan P. Leukocyte adhesion and thrombosis. *Curr Opin Hematol* 2006;**13**:34–39.
133. Spronk HM, van der Voort D, Ten Cate H. Blood coagulation and the risk of atherothrombosis: a complex relationship. *Thromb J* 2004;**2**:12.
134. Borissoff JI, Spronk HMH, Heeneman S, van der Voort D, Kassak P, Govers-Riemslog JW *et al.* Localization of coagulation proteins within the arterial vessel wall in relation to thrombogenicity and progression of atherosclerotic lesions (Abstract Book). *Fifteenth International Vascular Biology Meeting*, Sydney, Australia, 2008.
135. Esmon CT. Is APC activation of endothelial cell PAR1 important in severe sepsis? No. *J Thromb Haemost* 2005;**3**:1910–1911.
